# Supplementary material for: A Comprehensive Analysis of the Effect of A>I(G) RNA-Editing Sites on Genotoxic Drug Response and Progression in Breast Cancer
Source: MDPI journal article supplement (doi:10.3390/biomedicines12040728), 2024-03-25
Supplement: s1 [file s1]

**Table S7. Pathogenic DES associated with drug in transcripts of unrelated cancer genes from COSMIC database.** SIFT (Sorting Intolerant From Tolerant), PolyPhen (Polymorphism Phenotyping), Clinical significance (ClinVar; clinical significance), Combined Annotation-Dependent Depletion (CADD) Phred score by Variant Effect Predictor.

| Chr:Position         | Gene name | Drug sensitivity                                       | Amino acids | Codons  | SIFT               | PolyPhen                  | ClinVar                      | CADD PHRED |
|----------------------|-----------|--------------------------------------------------------|-------------|---------|--------------------|---------------------------|------------------------------|------------|
| Chr4:113359801_T/C   | ALPK1     | HS PARPi<br>HS anthracyclines<br>HS Alkylating agents  | L1117P      | cTg/cCg | Deleterious (0)    | Probably damaging (0.999) | benign                       | 32         |
| Chr 11:118971106_T/C | DPAGT1    | LS PARPi<br>LS anthracyclines*<br>LS Alkylating agents | Y170C       | tAt/tGt | Deleterious (0)    | Probably damaging (0.997) | VUS, pathogenic              | 31         |
| Chr 3:33093480_T/C   | GLB1      | LS_PARPi<br>LS anthracyclines<br>LS Alkylating agents  | Y270C       | tAt/tGt | Deleterious (0)    | Probably damaging (0.997) | Likely pathogenic            | 29.8       |
| Chr17:33430313_T/C   | RAD51D    | LS_PARPi<br>LS anthracyclines<br>LS Alkylating agents  | E253G       | gAg/gGg | Deleterious (0.03) | Probably damaging (0.999) | benign/likely benign, benign | 28.9       |
| Chr 12:56814403_A/G  | TIMELESS  | LS PARPi<br>LS anthracyclines<br>LS Alkylating agents  | F1060L      | Ttt/Ctt | Deleterious (0)    | Probably damaging (0.999) | benign                       | 28.7       |
| Chr 2:70504399_A/G   | PCYOX1    | LS PARPi<br>LS Alkylating agents                       | S465G       | Agt/Ggt | Deleterious (0.01) | Probably damaging (0.999) | benign                       | 28         |
| Chr 17:39977249_T/C  | FKBP10    | HS_PARPi                                               | I436T       | aTc/aCc | Deleterious (0)    | Probably damaging (0.999) | Likely benign, CIP           | 27.9       |
| Chr 6:18130918_T/C   | TPMT      | LS PARPi<br>LS anthracyclines<br>LS Alkylating agents  | Y240C       | tAt/tGt | Deleterious (0)    | Probably damaging (0.998) | Likely benign, drug response | 27.7       |
| Chr 12:6458350_A/G   | SCNN1A    | LS PARPi<br>HS anthracyclines<br>LS Alkylating agents  | W552R       | Tgg/Cgg | Deleterious (0)    | Probably damaging (1)     | Benign/ likely benign        | 27.4       |

|                            |       |                                                       |            |         |                       |                              |                         |      |
|----------------------------|-------|-------------------------------------------------------|------------|---------|-----------------------|------------------------------|-------------------------|------|
| Chr<br>11:73796<br>878_T/C | C2CD3 | HS PARPi<br>LS anthracyclines<br>LS Alkylating agents | N1232<br>S | aAt/aGt | Deleterious<br>(0.02) | Probably damaging<br>(0.994) | Benign/likely<br>benign | 26.8 |
|----------------------------|-------|-------------------------------------------------------|------------|---------|-----------------------|------------------------------|-------------------------|------|

**Table S8. Pathogenic DES associated with drug sensitivity with damaging consequences predicted in transcripts of related cancer genes from COSMIC database.** SIFT (Sorting Intolerant From Tolerant), PolyPhen (Polymorphism Phenotyping), Clinical significance (ClinVar; clinical significance) by Variant Effect Predictor; TSG (tumour suppressor gene) from CGC from COSMIC database.

| Chr:Position        | Gene<br>name | Drug sensitivity                                          | Amino<br>acids | Codon       | SIFT                  | PolyPhen                        | ClinVar                             | Role in<br>cancer by<br>CGC |
|---------------------|--------------|-----------------------------------------------------------|----------------|-------------|-----------------------|---------------------------------|-------------------------------------|-----------------------------|
| Chr 11:3800205_T/C  | NUP98        | HS PARPi<br>HS anthracyclines<br>HS Alkylating<br>agents  | T85A           | Aca/Gc<br>a | Deleterious<br>(0.01) | Possibly<br>damaging<br>(0.58)  | Benign                              | oncogene,<br>fusion         |
| Chr12:49428694_T/C  | KMT2D        | LS PARPi<br>LS anthracyclines<br>HS Alkylating<br>agents  | D3419<br>G     | gAt/gGt     | Deleterious<br>(0)    | Probably<br>damaging<br>(0.996) | Likely<br>benign                    | oncogene,<br>TSG            |
| Chr 16:14042077_A/G | ERCC4        | LS PARPi<br>LS anthracyclines<br>LS Alkylating<br>agents  | E875G          | gAa/gG<br>a | Deleterious<br>(0.02) | Possibly<br>damaging<br>(0.585) | Benign,<br>likely<br>benign         | TSG                         |
| Chr 17:41246481_T/C | BRCA1        | HS PARPi<br>HS anthracyclines                             | Q356R          | cAg/cG<br>g | Deleterious<br>(0.02) | Possibly<br>damaging<br>(0.795) | Benign,<br>VUS                      | TSG                         |
| Chr 17:7578190_T/C  | TP53         | LS PARPi<br>LS anthracyclines*<br>HS Alkylating<br>agents | Y220C          | tAt/tGt     | Deleterious<br>(0)    | Probably<br>damaging<br>(0.998) | Likely<br>pathogenic,<br>pathogenic | oncogene,<br>TSG, fusion    |
| Chr17:7578442_T/C   | TP53         | HS PARPi<br>LS anthracyclines*<br>LS Alkylating<br>agents | Y163C          | tAc/tGc     | Deleterious<br>(0)    | Probably<br>damaging<br>(0.999) | Likely<br>pathogenic,<br>pathogenic | oncogene,<br>TSG, fusion    |

|                    |      |                                                          |       |         |                    |                                 |                                                                         |     |
|--------------------|------|----------------------------------------------------------|-------|---------|--------------------|---------------------------------|-------------------------------------------------------------------------|-----|
| Chr4:106197000_A/G | TET2 | HS PARPi<br>LS anthracyclines                            | H1778 | cAt/cGt | Deleterious (0.01) | Possibly<br>damaging<br>(0.551) | Not<br>provided                                                         | TSG |
| Chr7:6045634_T/C   | PMS2 | LS PARPi<br>LS anthracyclines<br>LS Alkylating<br>agents | I18V  | Att/Gtt | Deleterious (0)    | Probably<br>damaging<br>(0.994) | Benign,<br>VUS,<br>benign/likely<br>benign,<br>likely<br>benign,<br>CIP | TSG |

**Table S9. Clinical and molecular characterization of 86 women with basal breast cancer from TCGA.**

|                                           | Low-PFS (n=43)                    | High-PFS (n=43)                 | p-value |
|-------------------------------------------|-----------------------------------|---------------------------------|---------|
| <b>Age at diagnosis (years)</b>           |                                   |                                 | 0.111   |
| Mean (SD)                                 |                                   |                                 |         |
| Median (min, Max)                         | 58.2 (12.4)<br>56 (29-84)         | 53.8 (13.1)<br>51 (29, 83)      |         |
| <b>Progression-Free survival (months)</b> |                                   |                                 | <0.001  |
| Mean (SD)                                 |                                   |                                 |         |
| Median (min, Max)                         | 6.49 (4.76)<br>7.46 (0, 13.6)     | 96.5 (39.9)<br>89.5 (55.6, 256) |         |
| <b>TMB non-synonymous</b>                 |                                   |                                 | 0.685   |
| Mean (SD)                                 |                                   |                                 |         |
| Median (min, Max)                         | 3.62 (6.13)<br>2.63 (0.167, 41.8) | 3.16 (4.11)<br>2.27 (0.5, 28)   |         |
| <b>Mutation count</b>                     |                                   |                                 | 0.609   |
| Mean (SD)                                 | 107 (184)                         | 89.8 (122)                      |         |
| Median (min, Max)                         | 78 (6, 41.8)                      | 57 (15, 827)                    |         |
| <b>Ethnicity category</b>                 |                                   |                                 | 1       |
| Not Hispanic or latino                    | 36 (83.7%)                        | 36 (83.7%)                      |         |
| Hispanic or latino                        | 0 (0%)                            | 1 (2.3%)                        |         |
| Missing                                   | 7 (16.3%)                         | 6 (14%)                         |         |
| <b>Ancestry</b>                           |                                   |                                 | 0.629   |
| AFR                                       | 6 (14%)                           | 4 (9.3%)                        |         |
| AFR_ADMIX                                 | 4 (9.3%)                          | 3 (7%)                          |         |
| EUR                                       | 26 (60.5%)                        | 31 (72.1%)                      |         |
| Missing                                   | 7 (16.3%)                         | 0 (0%)                          |         |
| <b>Race category</b>                      |                                   |                                 | 0.0487  |
| Asian                                     | 5 (11.6%)                         | 0 (0%)                          |         |
| Black or African American                 | 11 (25.6%)                        | 11 (25.6%)                      |         |
| White                                     | 24 (55.8%)                        | 32 (74.4%)                      |         |
| Missing                                   | 3 (7%)                            | 0 (0%)                          |         |
| <b>Tumor type</b>                         |                                   |                                 | 0.409   |
| Infiltrating carcinoma (NOS)              | 1 (2.3%)                          | 0 (0%)                          |         |
| Infiltrating ductal carcinoma             | 37 (86%)                          | 39 (90.7%)                      |         |
| Infiltrating lobular carcinoma            | 1 (2.3%)                          | 0 (0%)                          |         |

|                              |            |            |       |
|------------------------------|------------|------------|-------|
| Medullary carcinoma          | 1 (2.3%)   | 1 (2.3%)   |       |
| Metaplastic carcinoma        | 2 (4.7%)   | 0 (0%)     |       |
| Other                        | 1 (2.3%)   | 3 (7%)     |       |
| <b>Tumor stage code</b>      |            |            | 0.159 |
| T1                           | 1 (2.3%)   | 3 (7%)     |       |
| T1C                          | 3 (7%)     | 9 (20.9%)  |       |
| T2                           | 30 (69.8%) | 25 (58.1%) |       |
| T3                           | 5 (11.6%)  | 4 (9.3%)   |       |
| T4                           | 2 (4.7%)   | 0 (0%)     |       |
| T4B                          | 2 (4.7%)   | 0 (0%)     |       |
| T4D                          | 0 (0%)     | 1 (2.3%)   |       |
| TX                           | 0 (0%)     | 1 (2.3%)   |       |
| <b>Lymph node stage code</b> |            |            | 0.138 |
| N0                           | 21 (48.8%) | 15 (34.9%) |       |
| N0 (I-)                      | 7 (16.3%)  | 11 (25.6%) |       |
| N1                           | 4 (9.3%)   | 5 (11.6%)  |       |
| N1A                          | 2 (4.7%)   | 5 (11.6%)  |       |
| N2                           | 4 (9.3%)   | 1 (2.3%)   |       |
| N3                           | 1 (2.3%)   | 0 (0%)     |       |
| N3A                          | 2 (4.7%)   | 0 (0%)     |       |
| N3B                          | 1 (2.3%)   | 0 (0%)     |       |
| N3C                          | 1 (2.3%)   | 0 (0%)     |       |
| N0 (I+)                      | 0 (0%)     | 1 (2.3%)   |       |
| N1B                          | 0 (0%)     | 3 (7%)     |       |
| N2A                          | 0 (0%)     | 2 (4.7%)   |       |
| <b>Metastasis stage code</b> |            |            | 0.359 |
| M0                           | 38 (88.4%) | 40 (93%)   |       |
| M1                           | 2 (4.7%)   | 0 (0%)     |       |
| MX                           | 3 (7%)     | 3 (7%)     |       |
